# Supplementary material for: An antioxidative galactomannan extracted from ChineseSesbania cannabinaenhances immune activation of macrophage cells
Source: Royal Society of Chemistry journal article supplement (doi:10.1039/d0fo02131h), 2020-01-01
Supplement: d0fo02131h1.pdf [file d0fo02131h1.pdf]

### Supporting Information

#### **An antioxidative galactomannan extracted from Chinese *Sesbania cannabina* enhances immune activation of macrophage cells**

Rui Li<sup>a,b</sup>, Chongyang Zhu<sup>a</sup>, Xiaojia Bian<sup>a</sup>, Xin Jia<sup>a</sup>, Ning Tang<sup>a\*</sup> and Yongqiang Cheng<sup>a\*</sup>

<sup>a</sup> College of Food Science and Nutritional Engineering, China Agricultural University, Beijing Key

Laboratory of Functional Food from Plant Resources, Beijing, 100083, China

<sup>b</sup> School of Public Health, Peking University, Beijing, 100191, China

\*Corresponding authors:

Ning Tang, Tel: +86-010-62737401, E-mail: ningtang@cau.edu.cn

Yongqiang Cheng, Tel: +86-010-62737401, E-mail: chengyq@cau.edu.cn

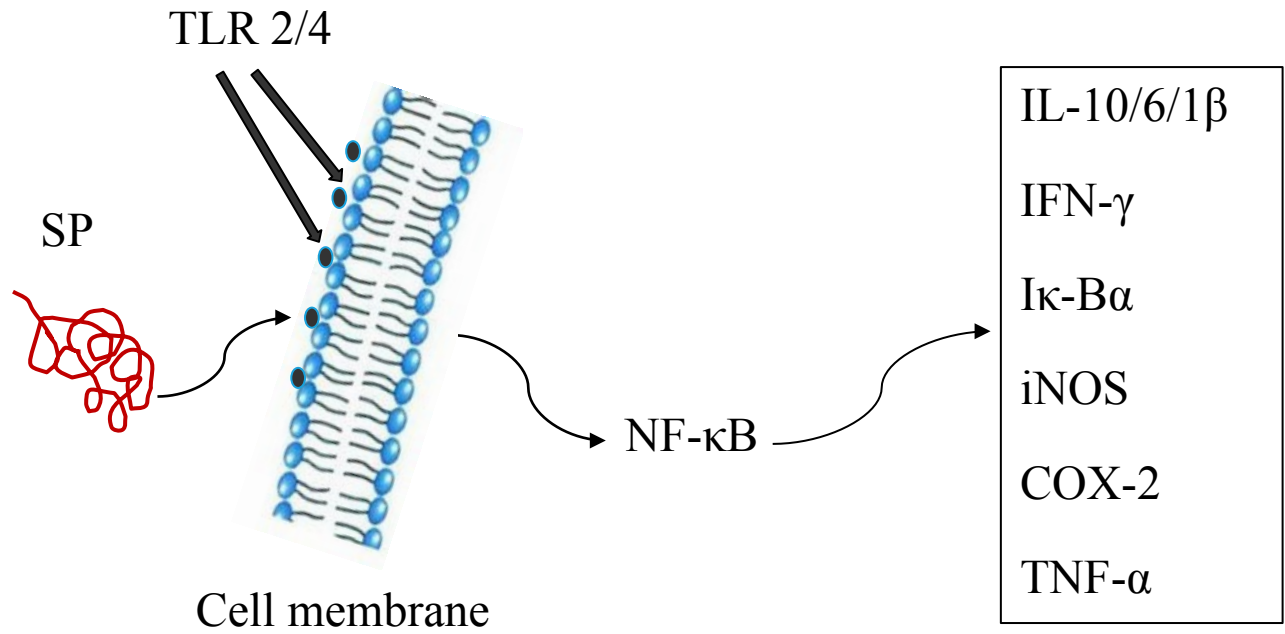

**Figure S1** The schematic diagram of polysaccharide extracted from Chinese *Sesbania cannabina* promoted macrophage immune by tuning TLR/NF-κB stimulatory signaling pathway.
